# Supplementary material for: HIRA dependent H3.3 deposition is required for transcriptional reprogramming following nuclear transfer to Xenopus oocytes
Source: PubMed Central journal article supplement (PMC3538669; doi:10.1186/1756-8935-5-17), 2012-10-29

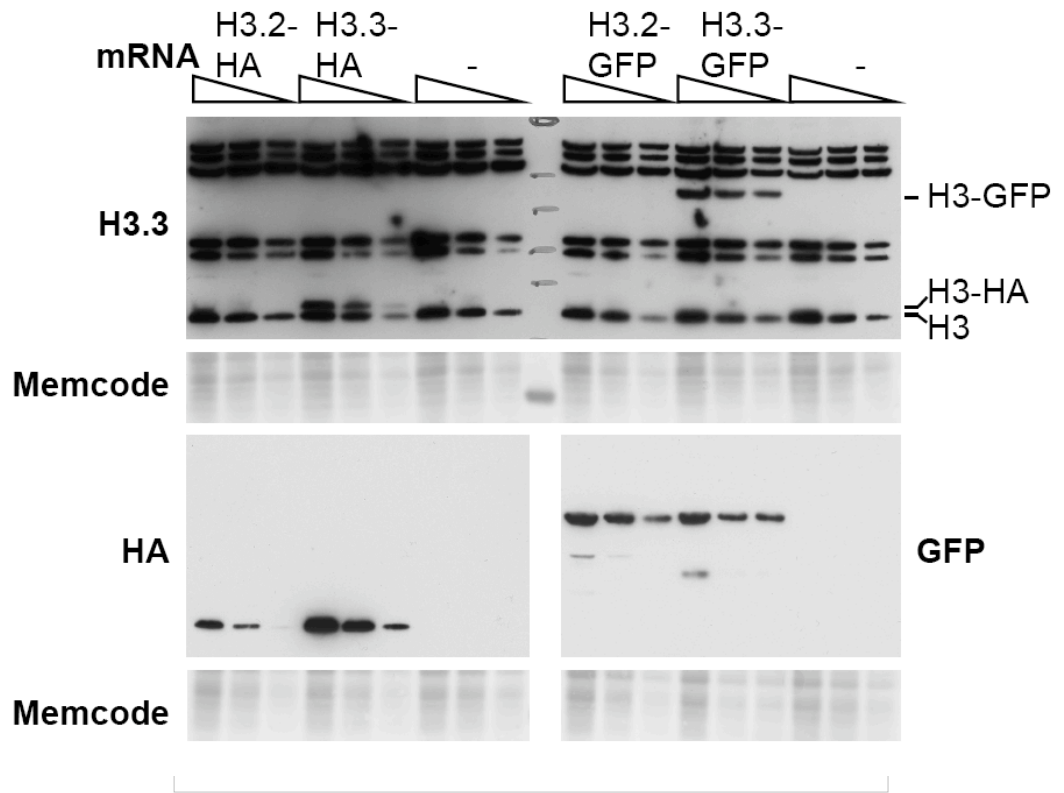

S2

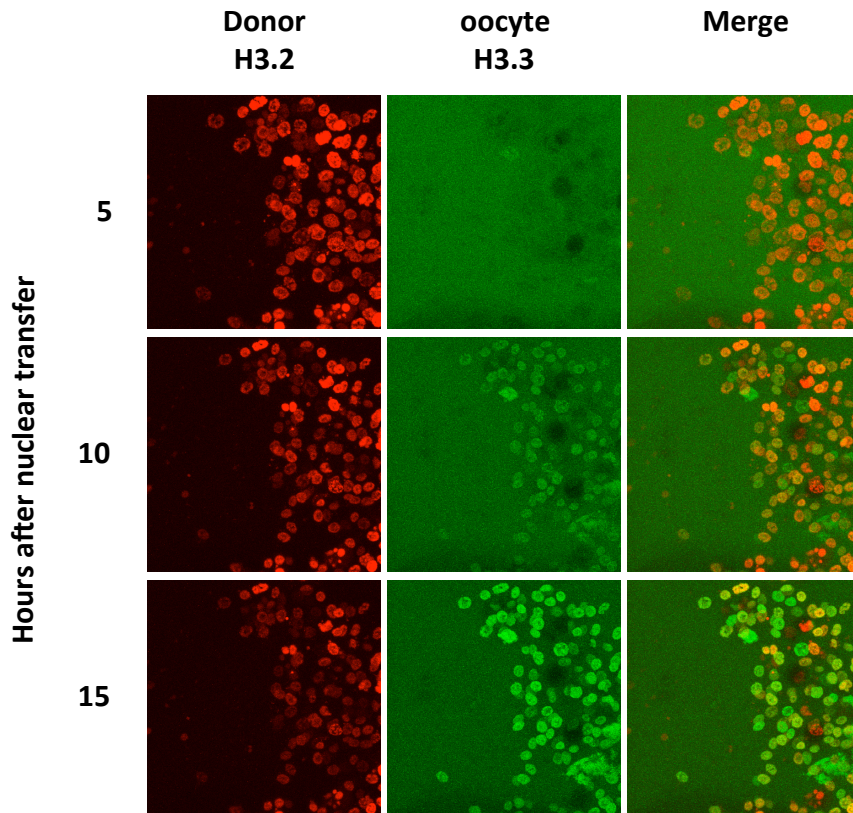

S3

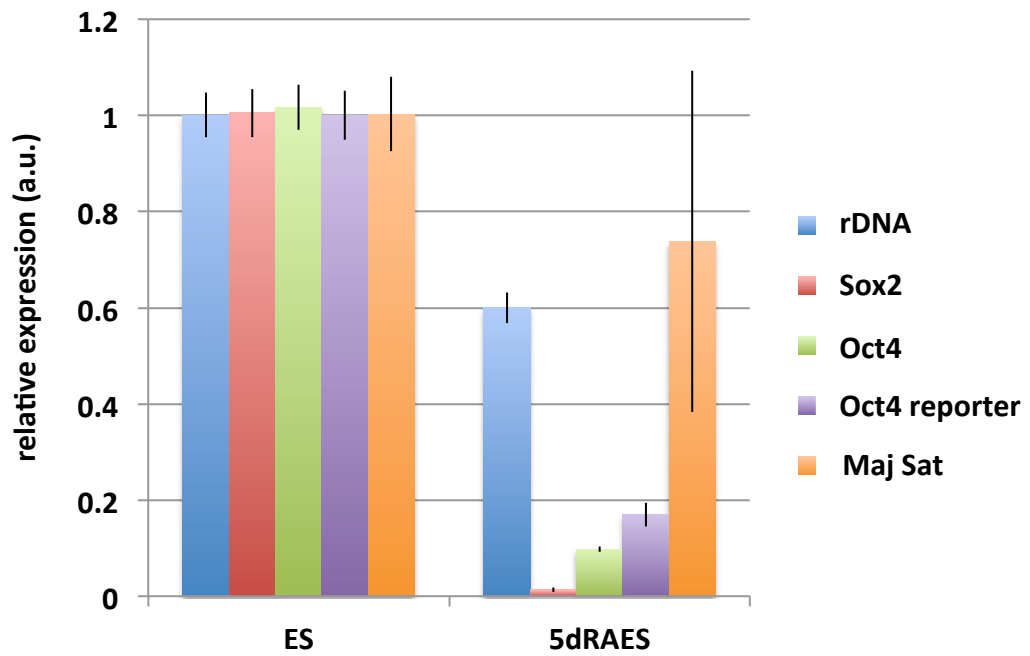

| Serum      | INPUT | -  |     |     | INPUT | pre-immune |     |     | INPUT | anti-HIRA |     |     |  |  |  |
|------------|-------|----|-----|-----|-------|------------|-----|-----|-------|-----------|-----|-----|--|--|--|
|            |       | 15 | 180 | 360 |       | 15         | 180 | 360 |       | 15        | 180 | 360 |  |  |  |
| Time (min) |       |    |     |     |       |            |     |     |       |           |     |     |  |  |  |

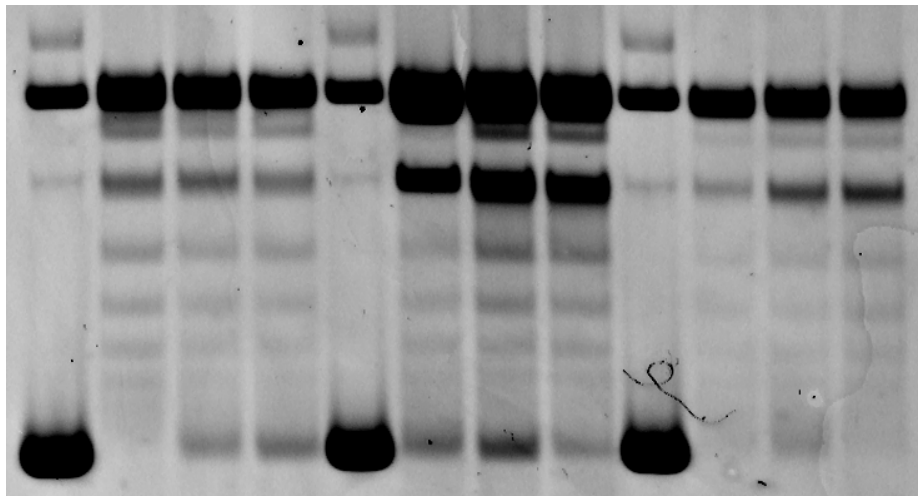

S5

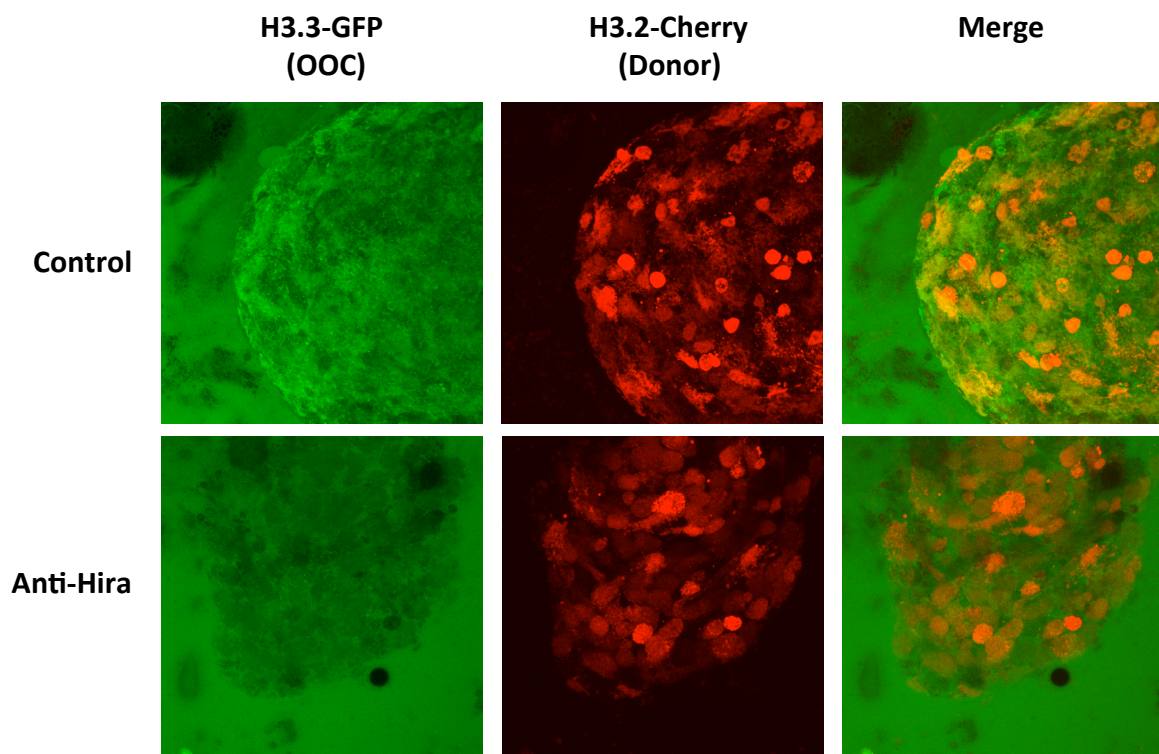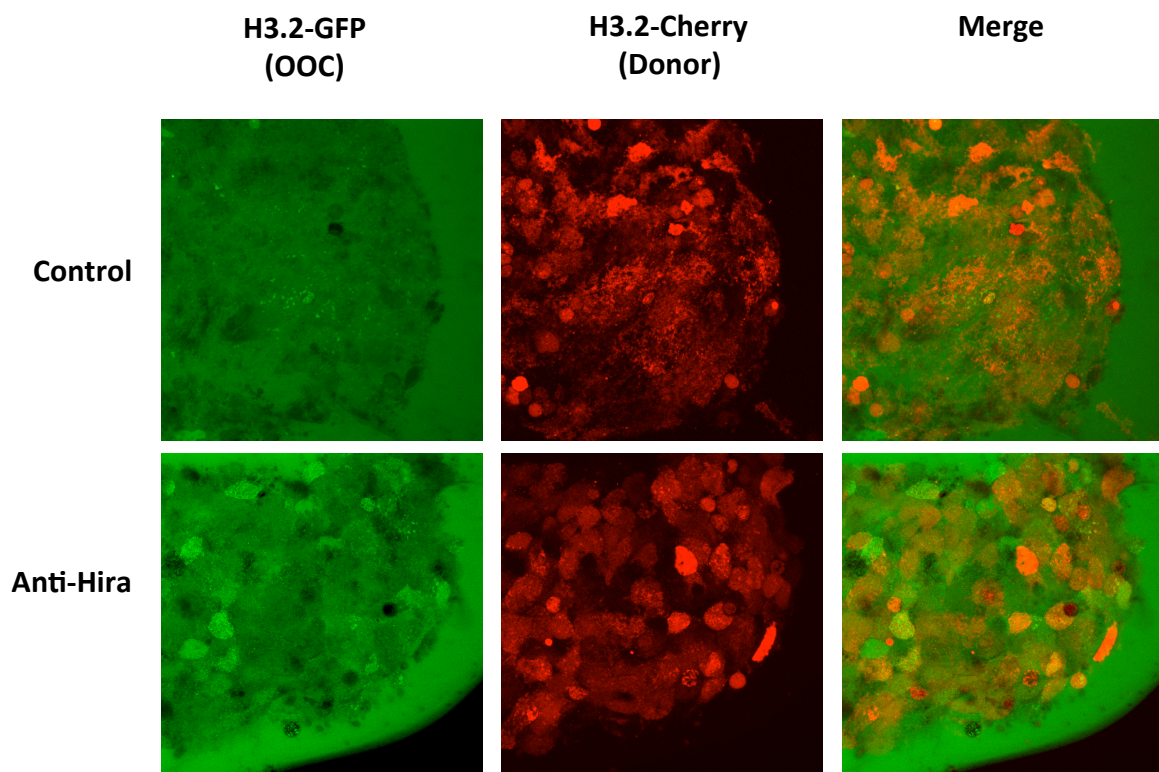

Supplement: 1756-8935-5-17-S1.pdf [file 1756-8935-5-17-S1.pdf]
